# Supplementary material
Source: ML conference proceedings conference paper supplement (https://openreview.net/forum?id=oxj8mx4Sv2)
Supplement: supplementary_material [file attachment]

# OpenML-CC18 Benchmark Suites on KGN and DN # (max sample, feature, class)

Classification Error

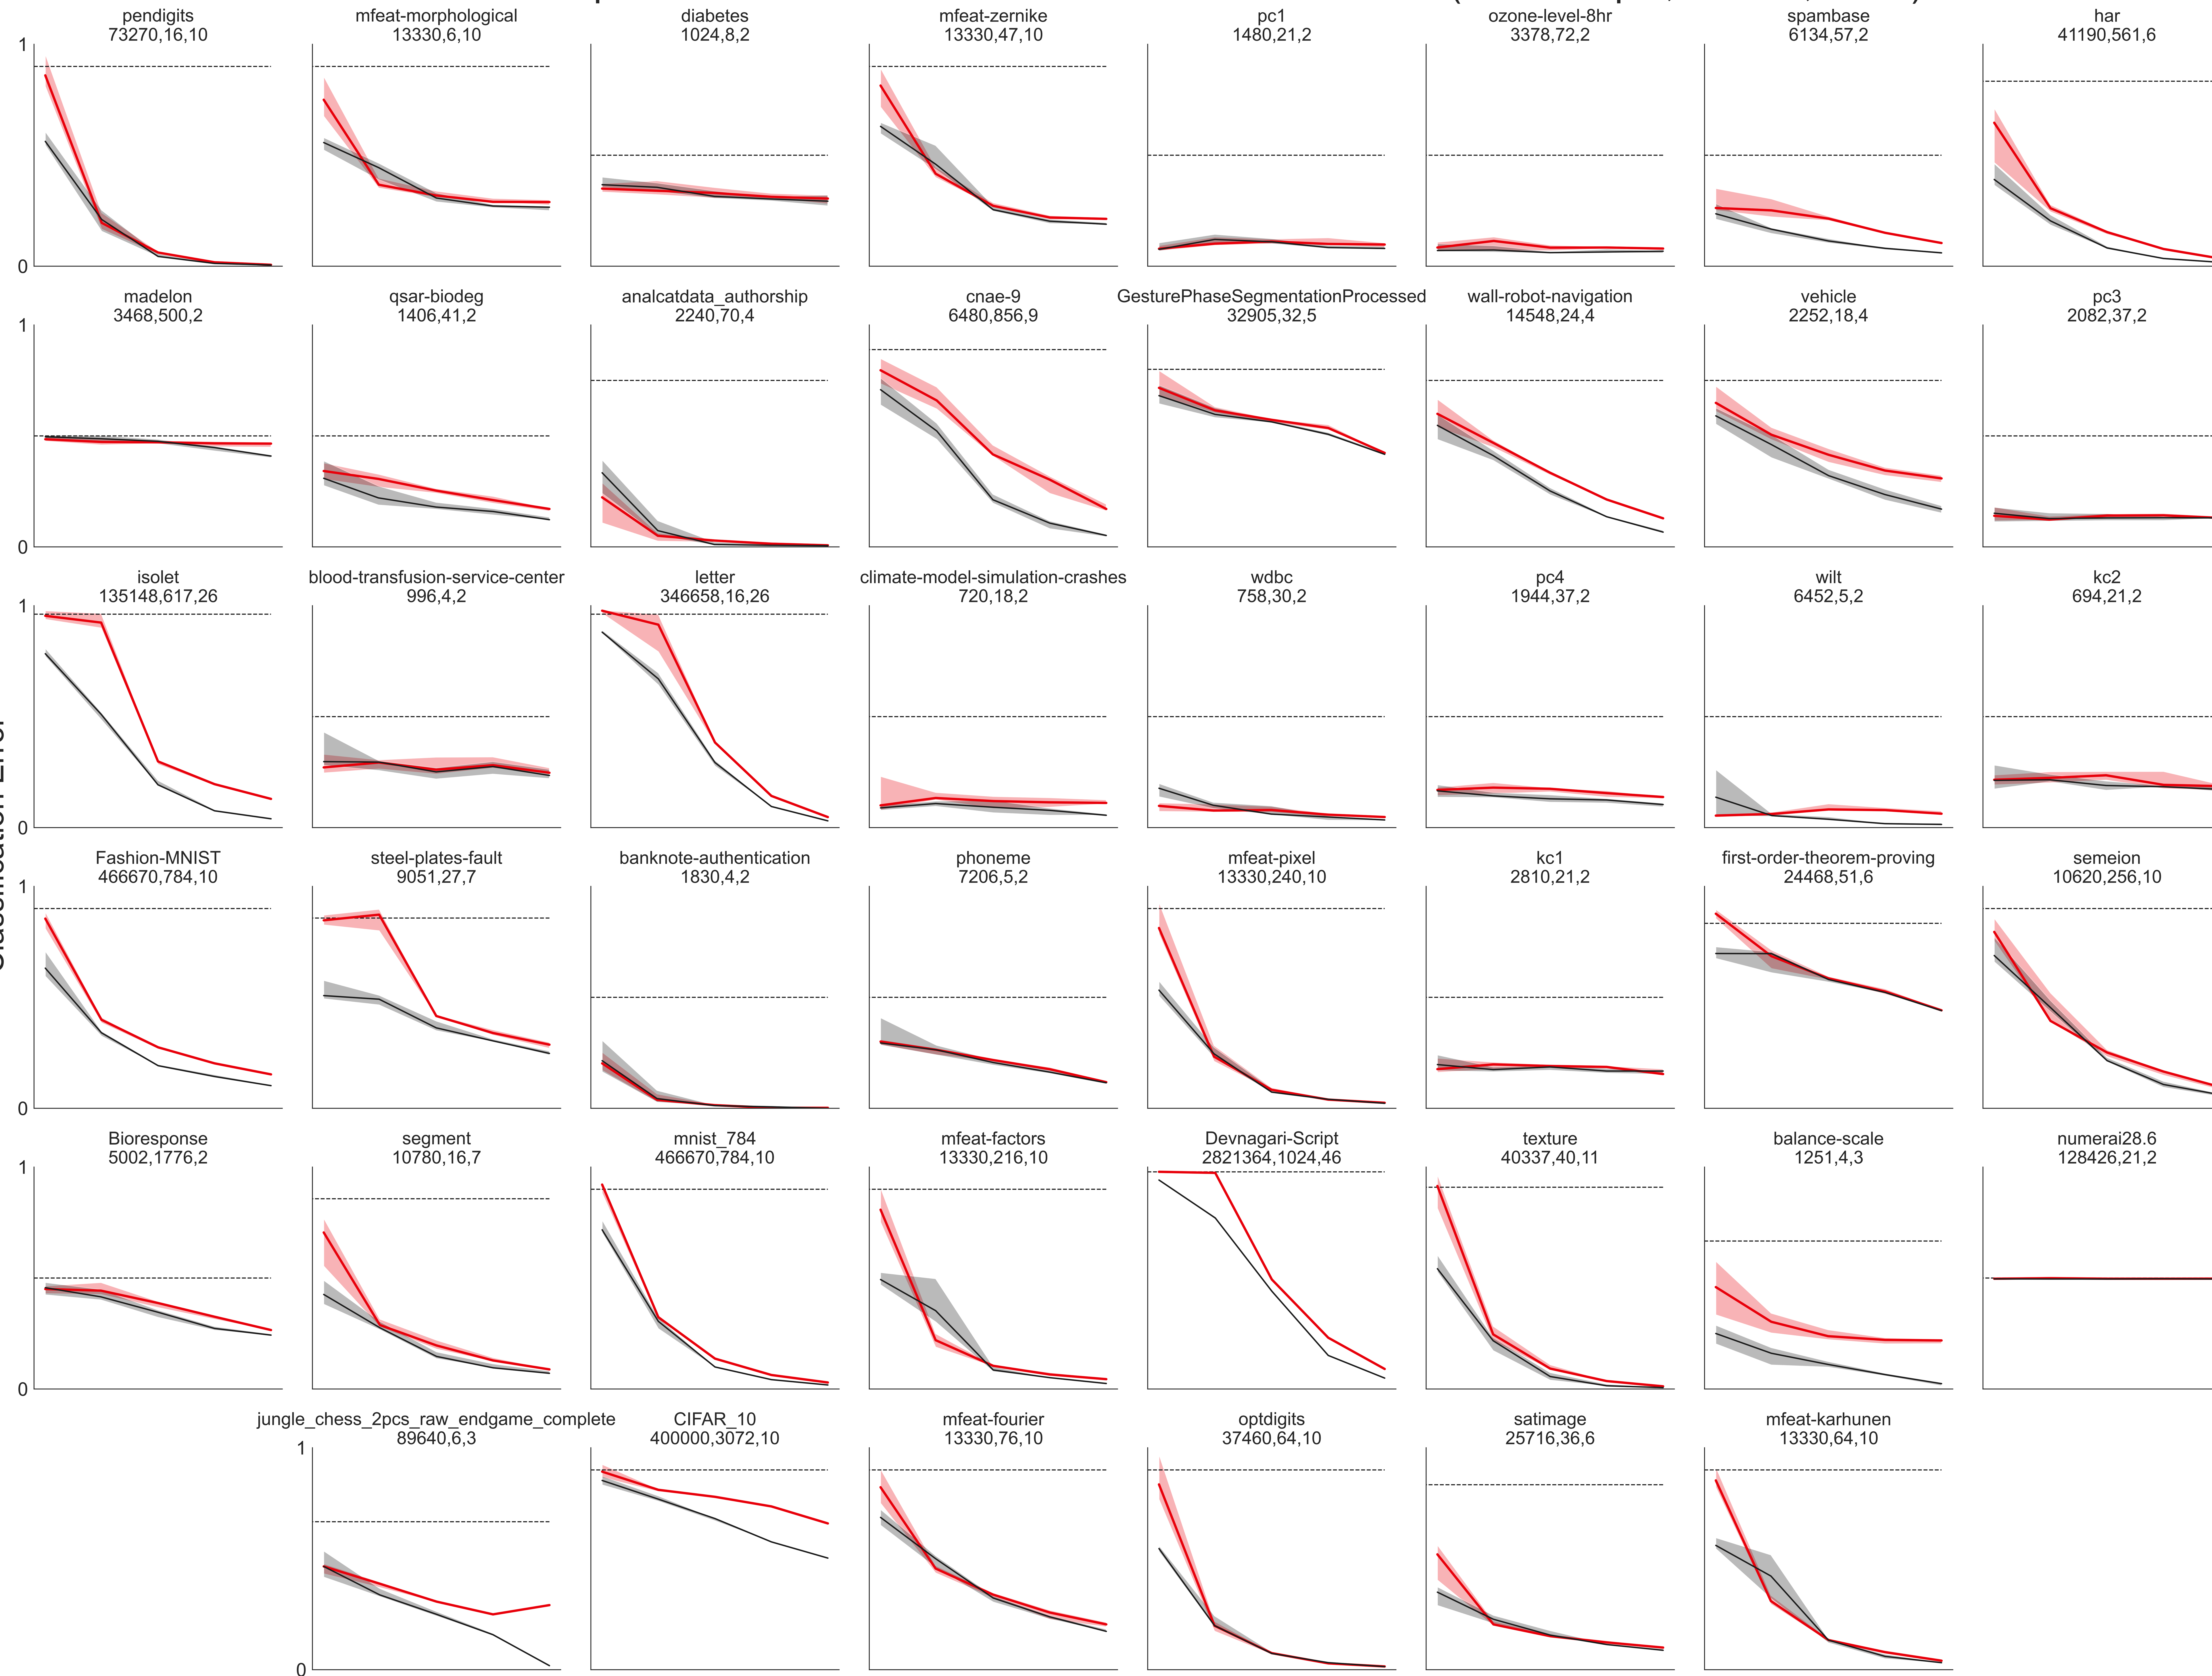

Number of Train Samples

— KGN — DN - - - - - chance performance
