# Supplementary material
Source: ML conference proceedings conference paper supplement (https://openreview.net/forum?id=oxj8mx4Sv2)

# OpenML-CC18 Benchmark Suites on KGF and RF#(max sample, feature, class)

Expected Calibration Error

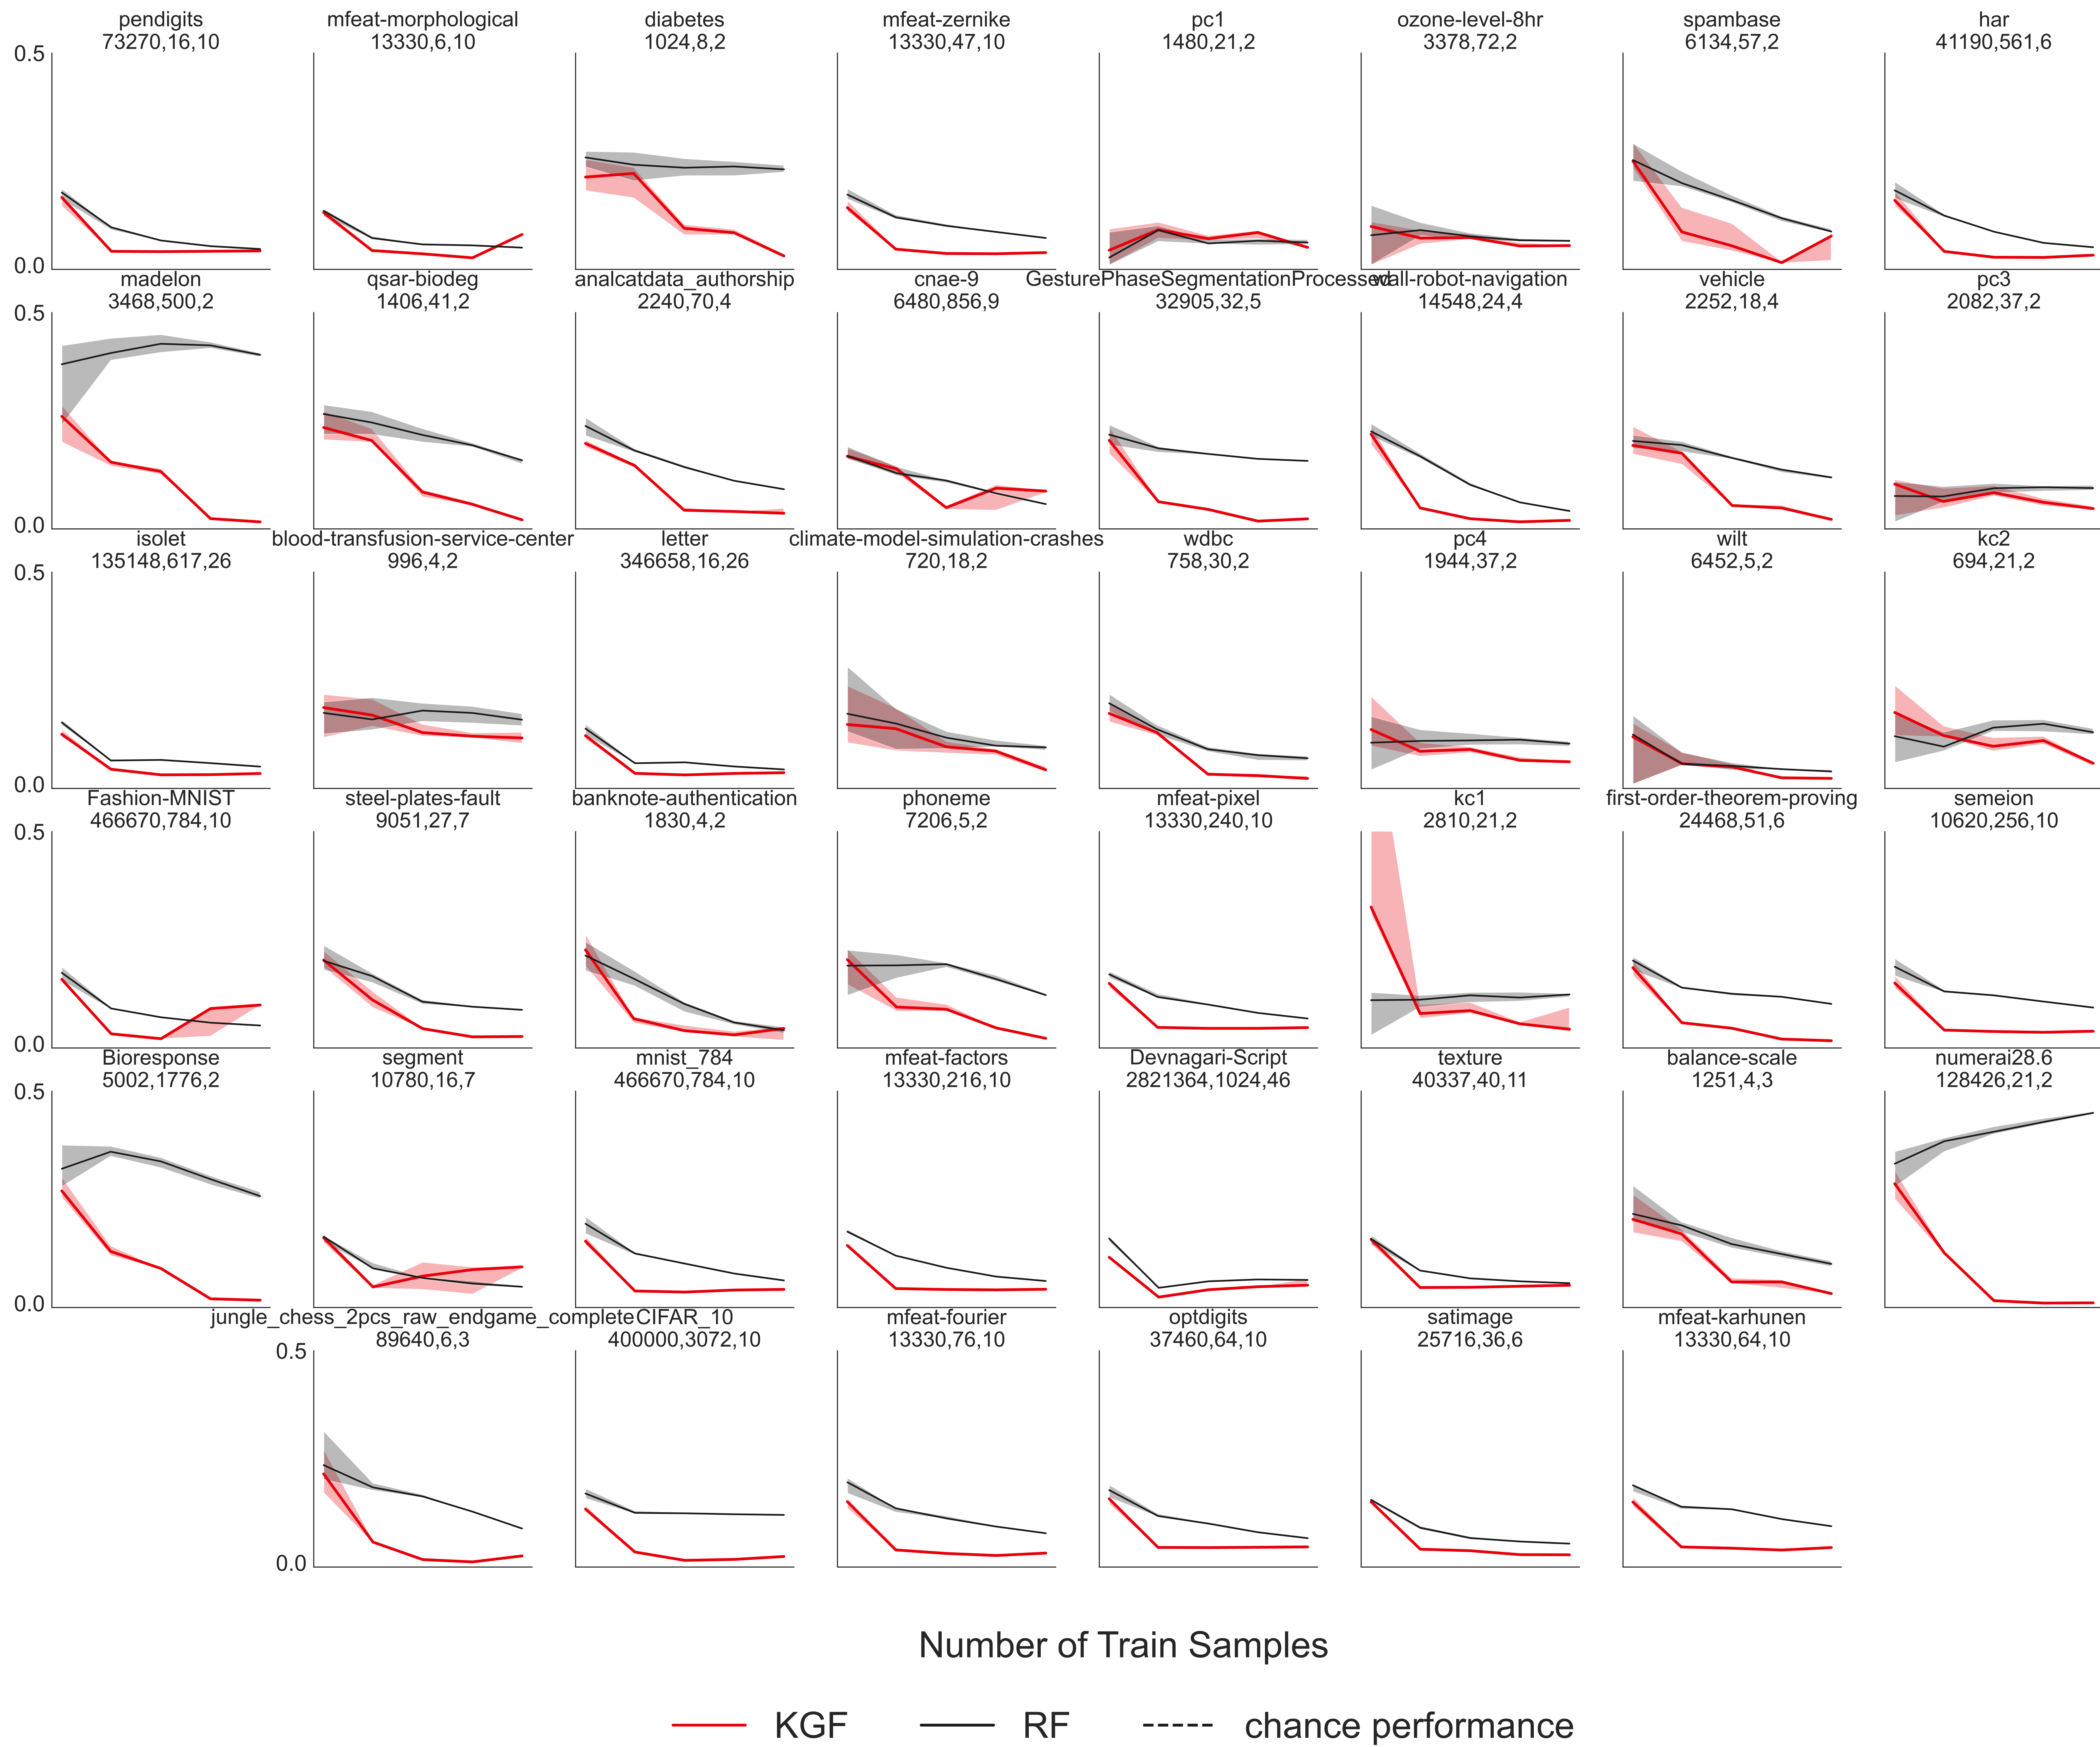

Supplement: supplementary_material [file attachment]

# OpenML-CC18 Benchmark Suites #(max sample, feature, class)

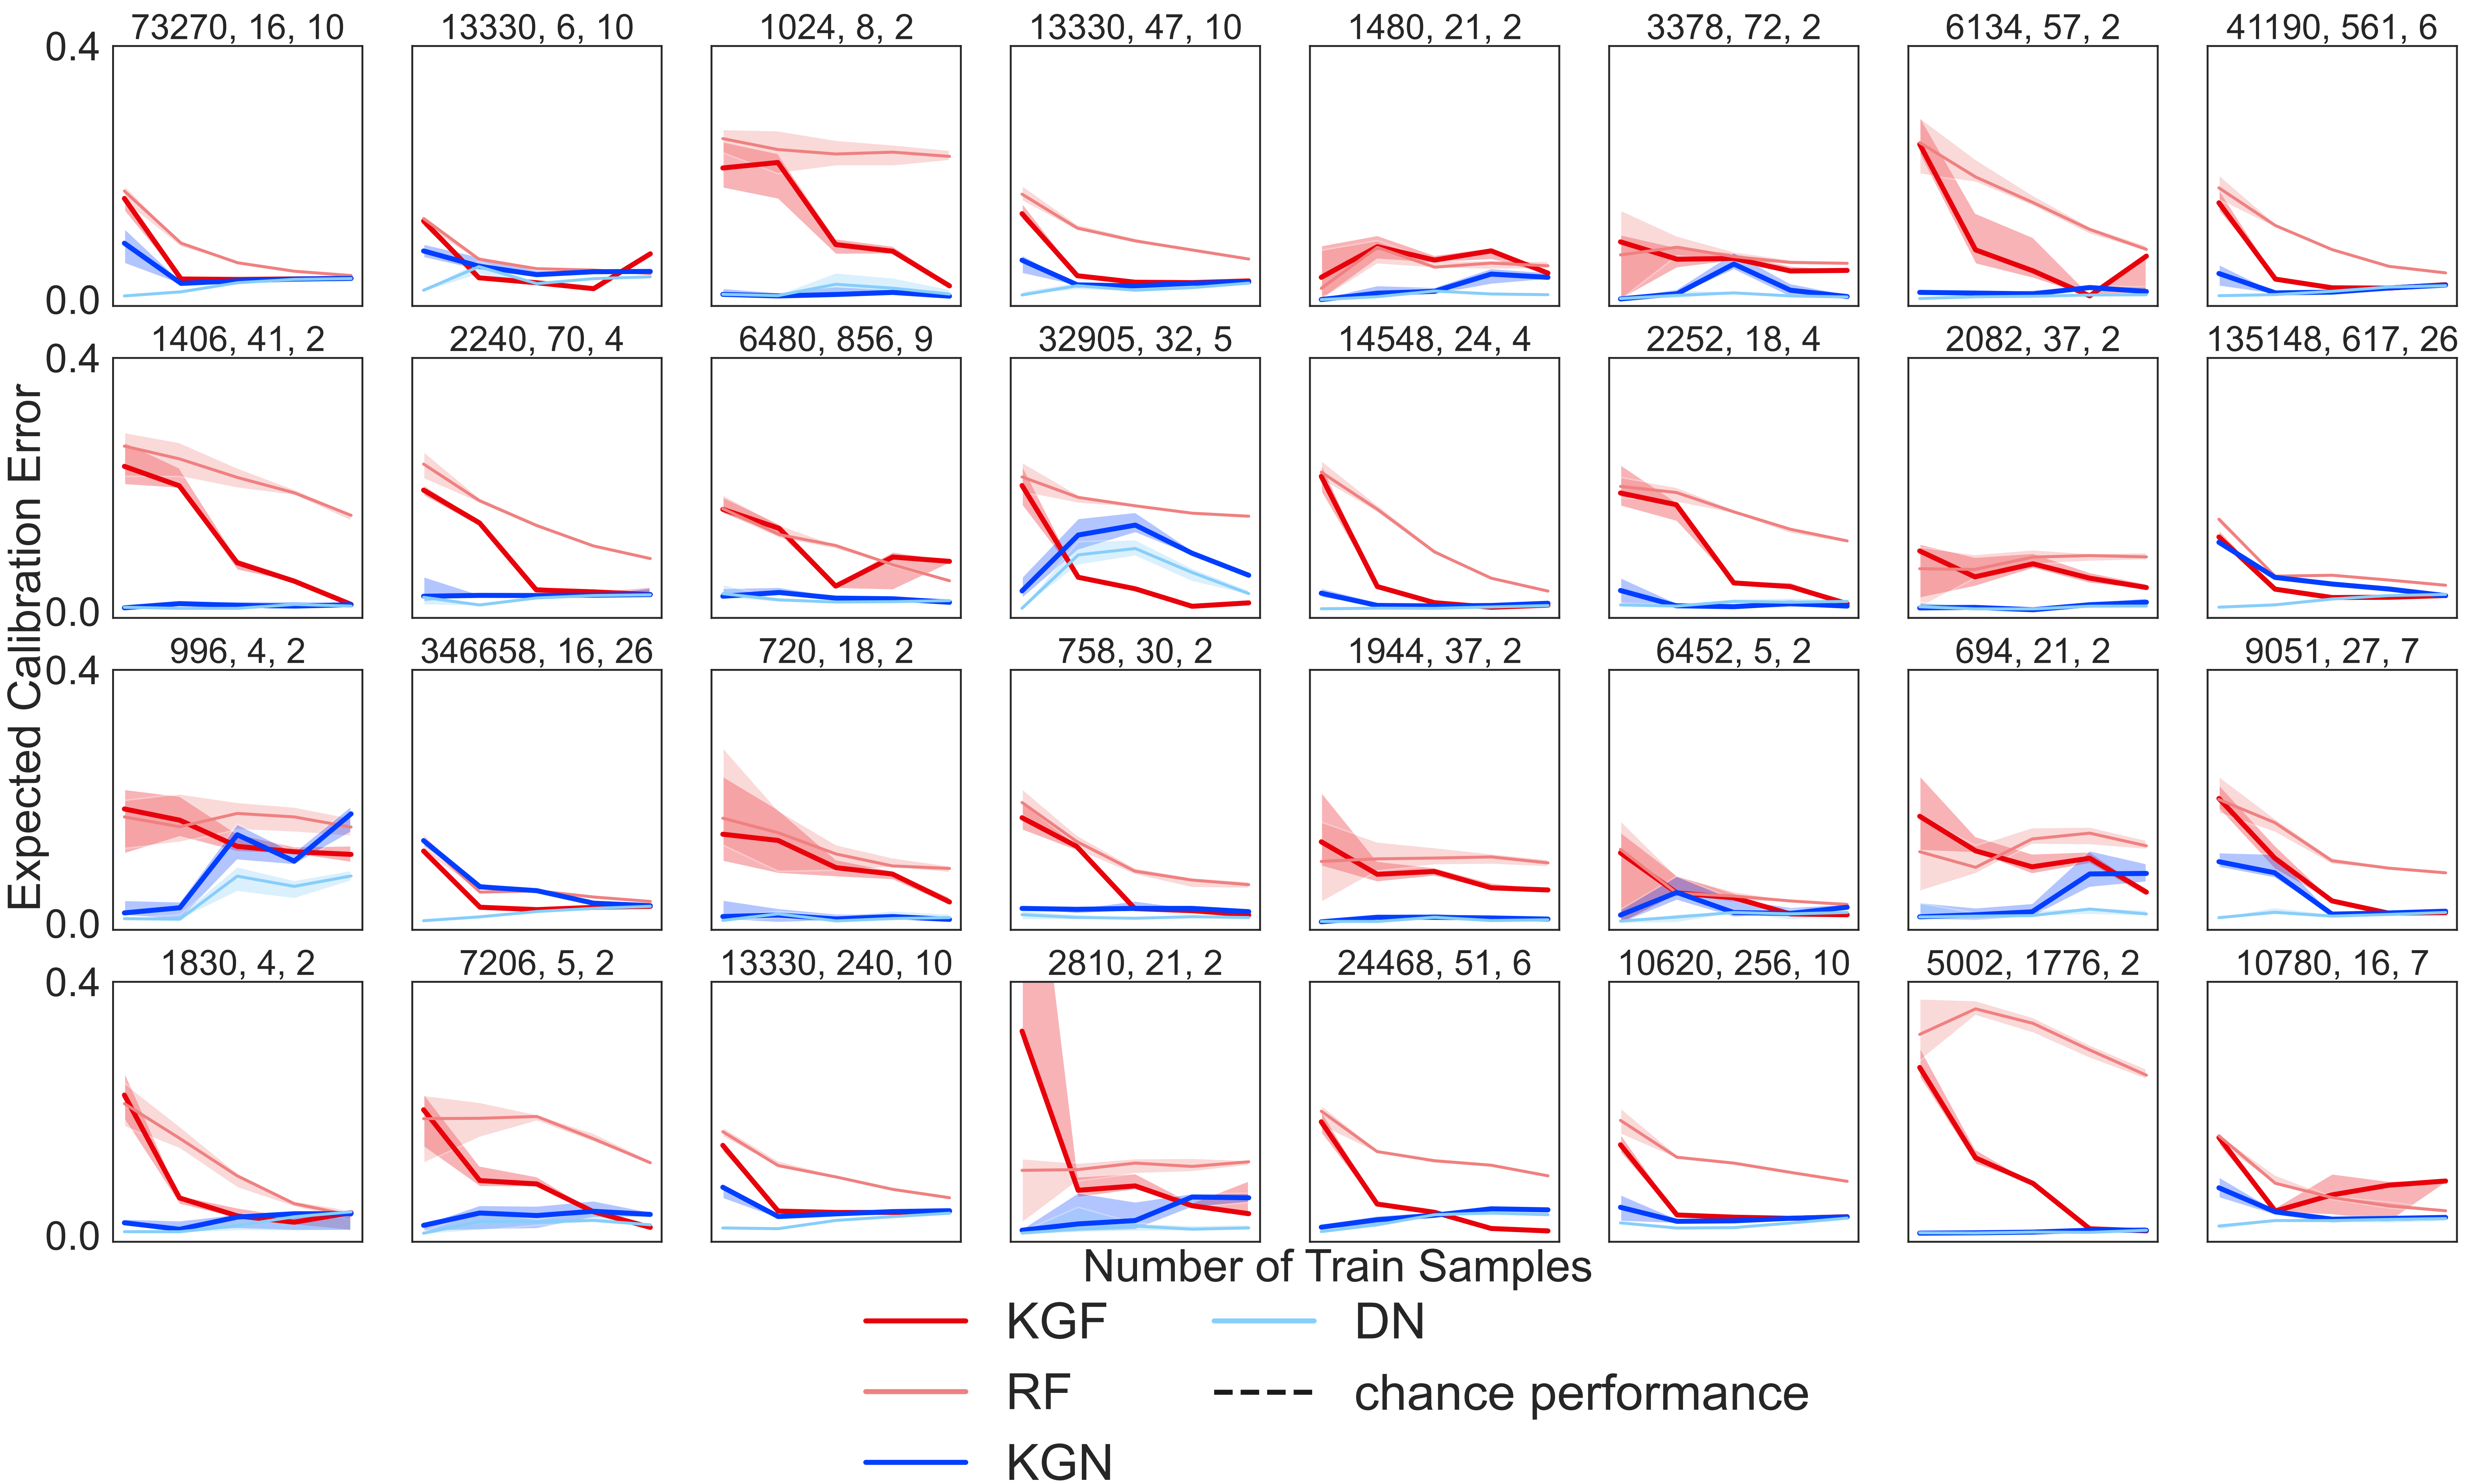

Supplement: supplementary_material [file attachment]

# OpenML-CC18 Benchmark Suites on KGF and RF # (max sample, feature, class)

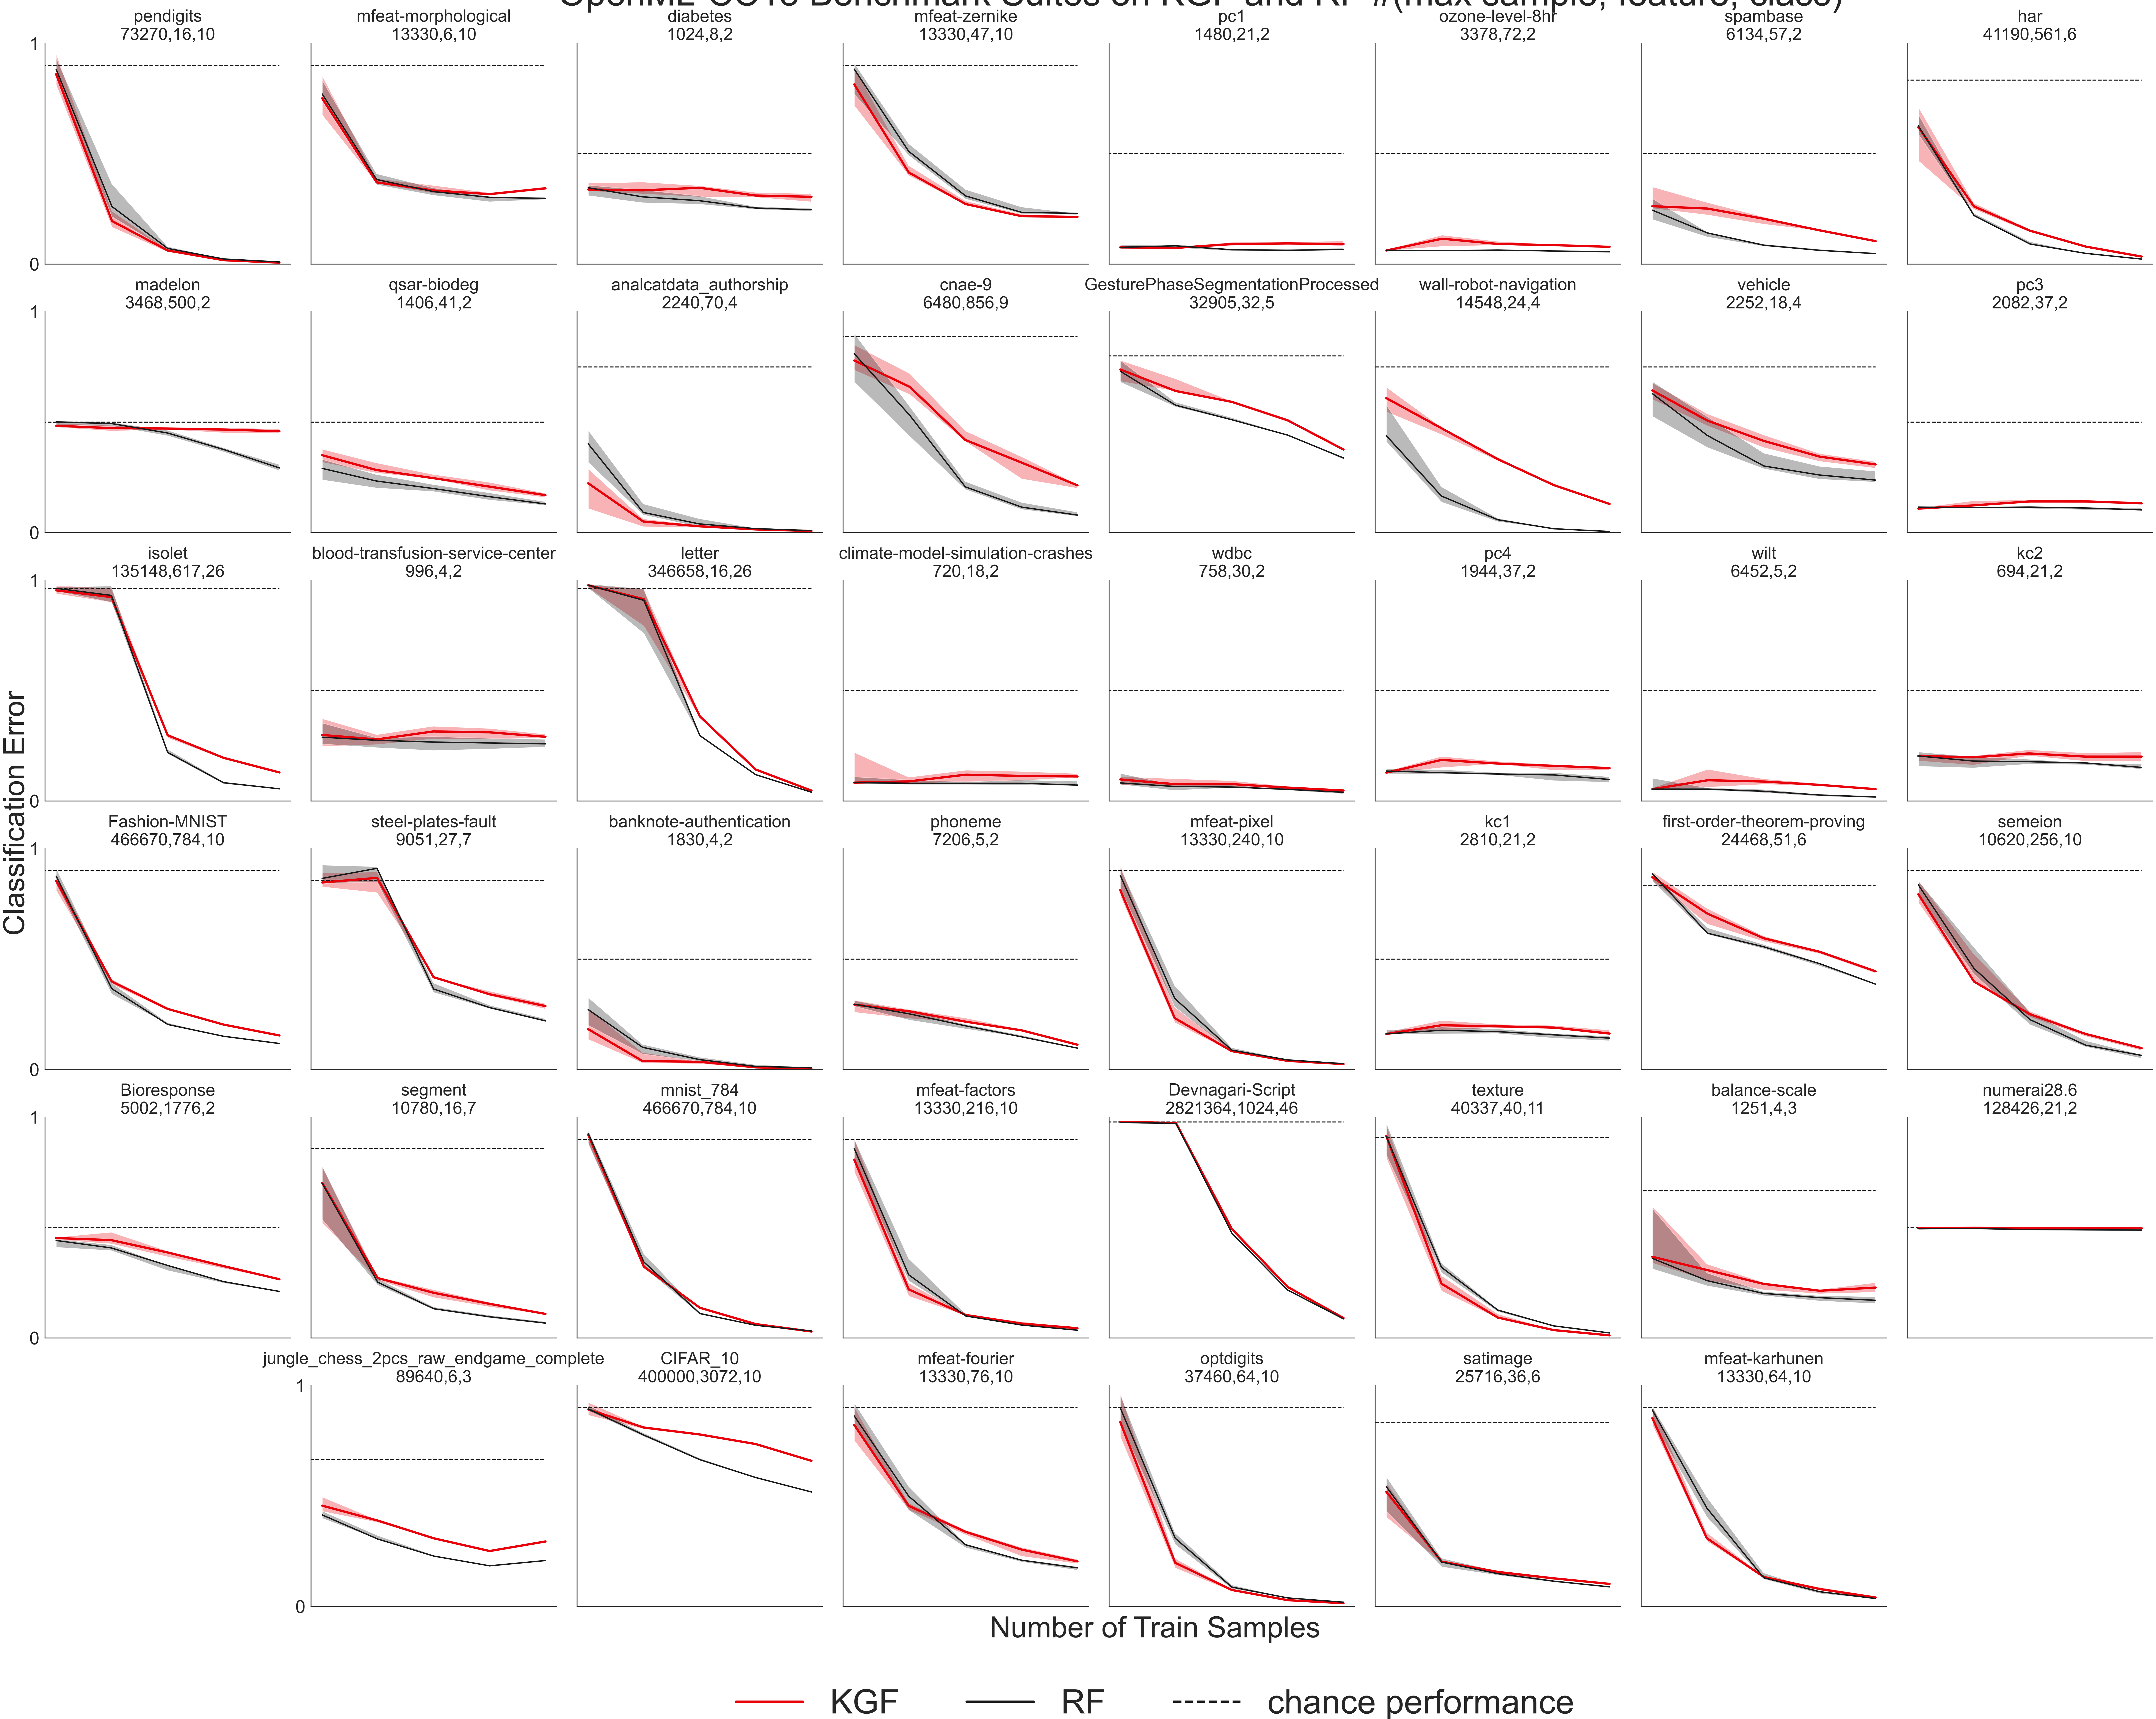

Supplement: supplementary_material [file attachment]

### Classification Error

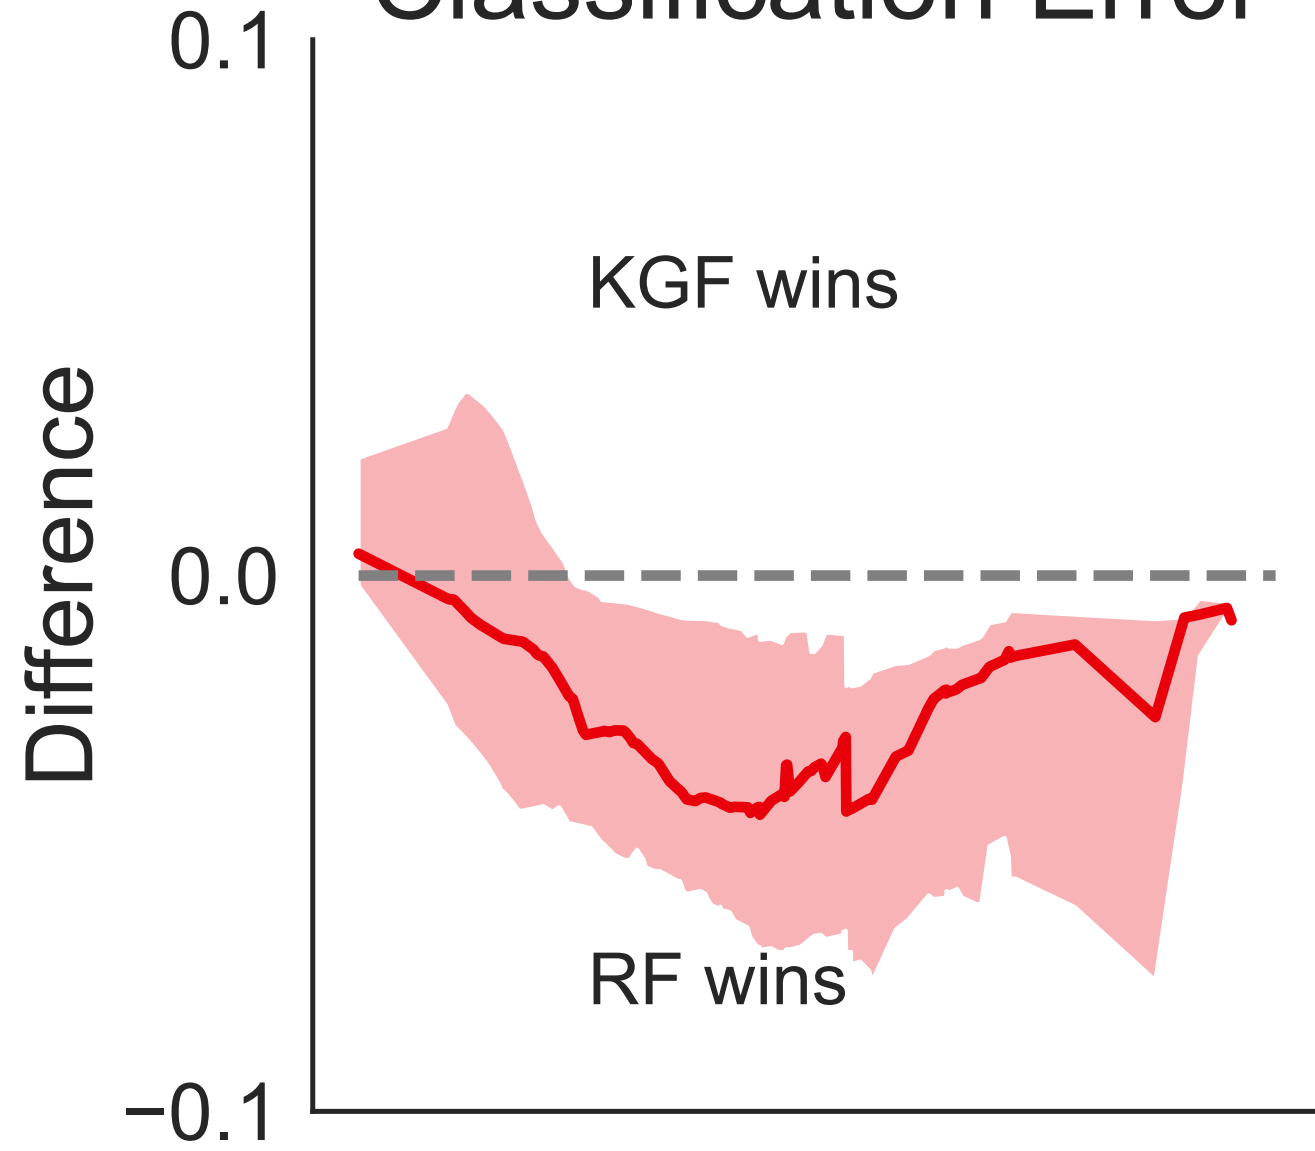

### ID Calibration Error

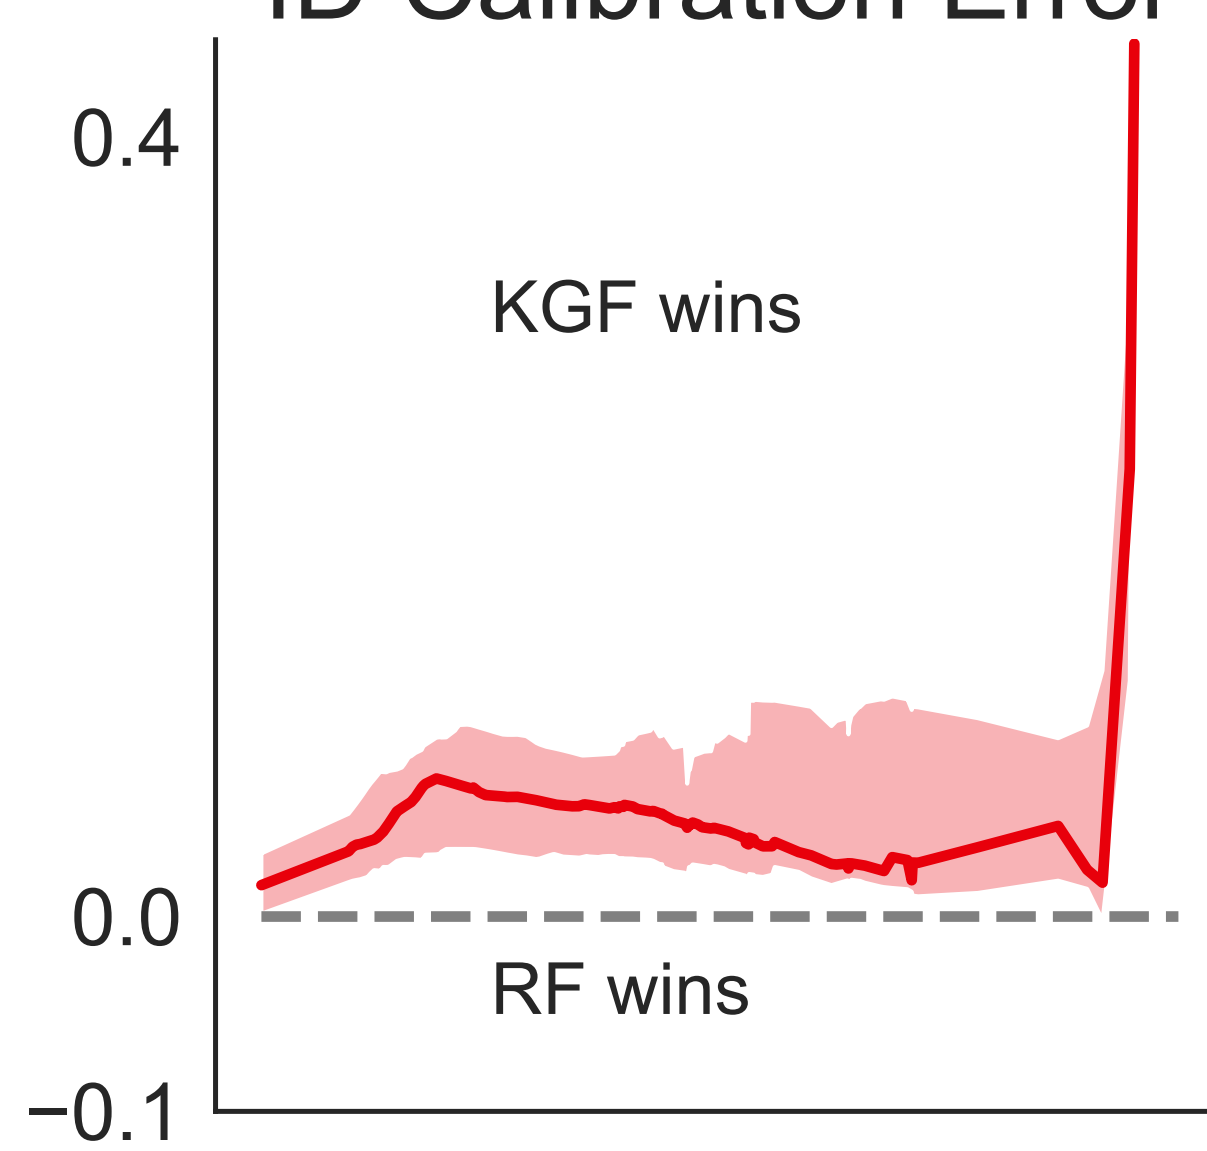

### OOD Calibration Error

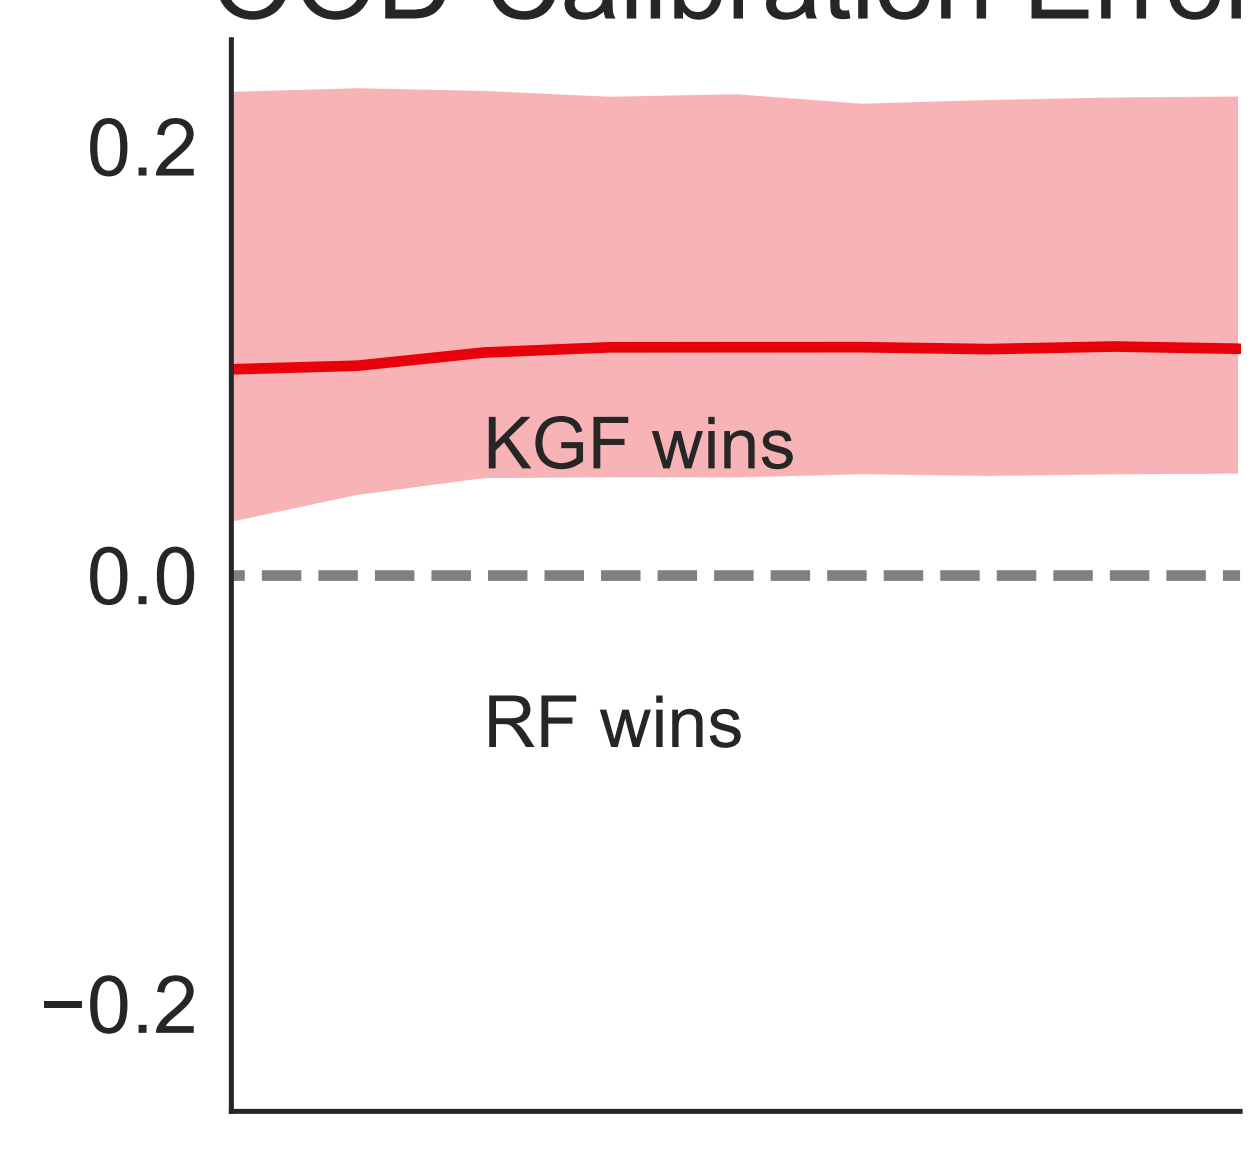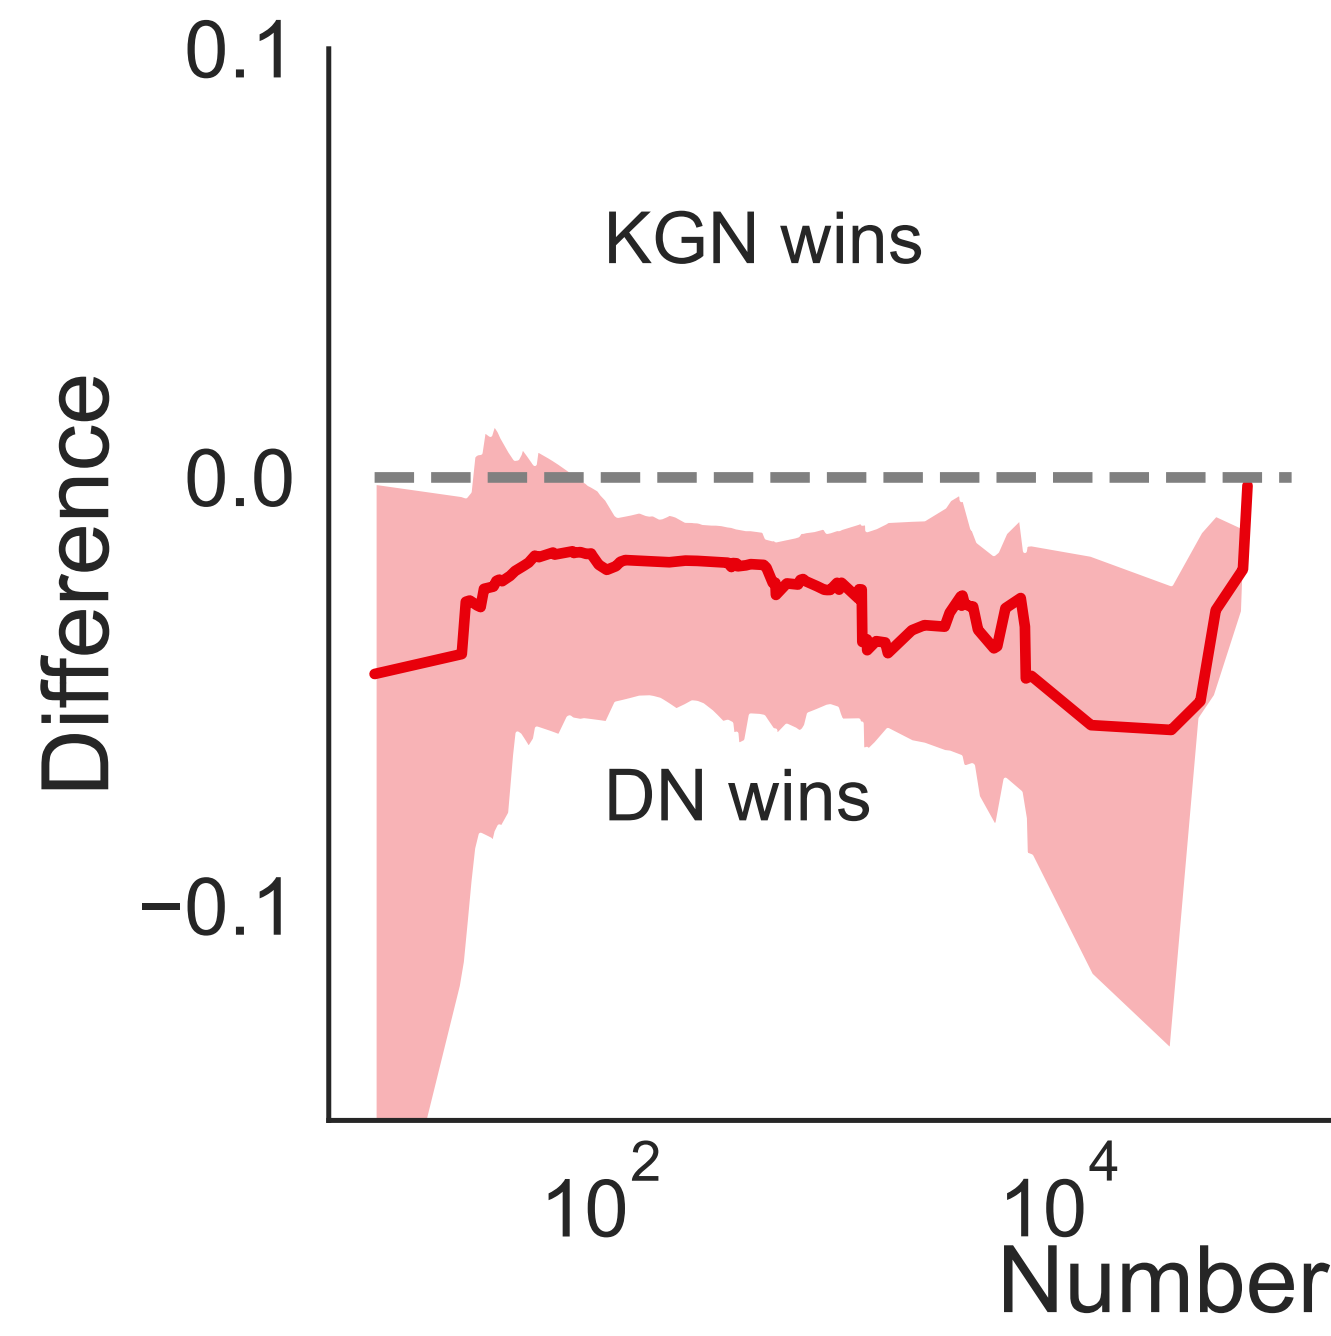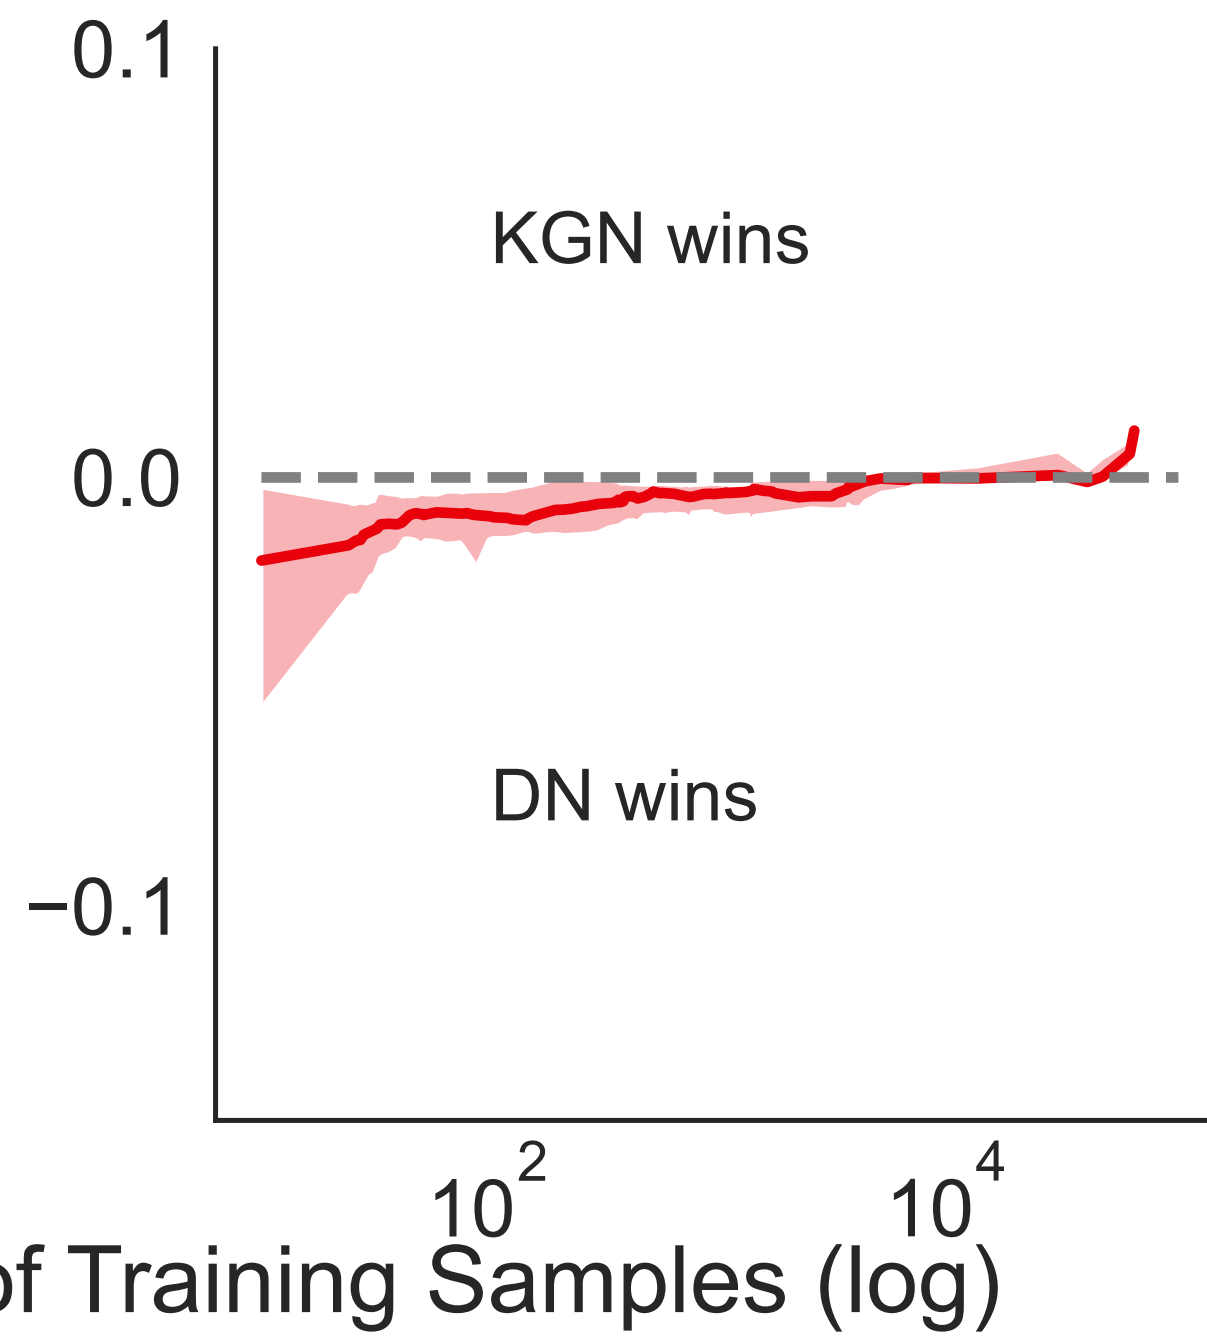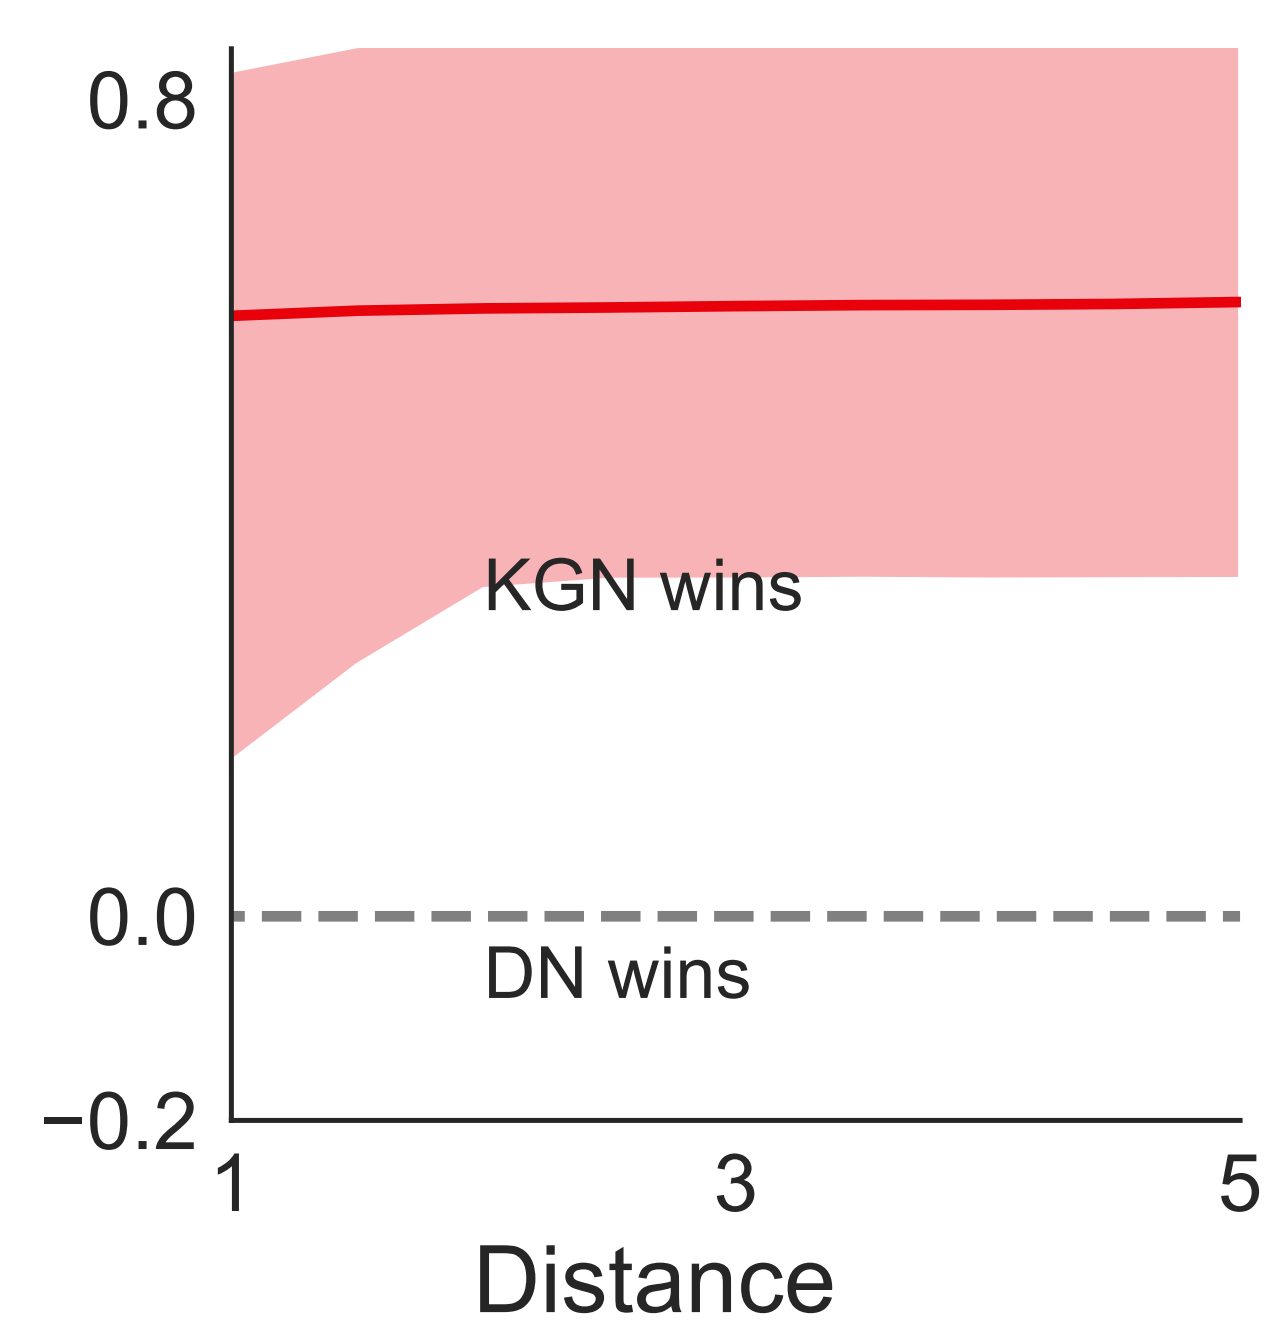

Supplement: supplementary_material [file attachment]

# OpenML-CC18 Benchmark Suites #(max sample, feature, class)

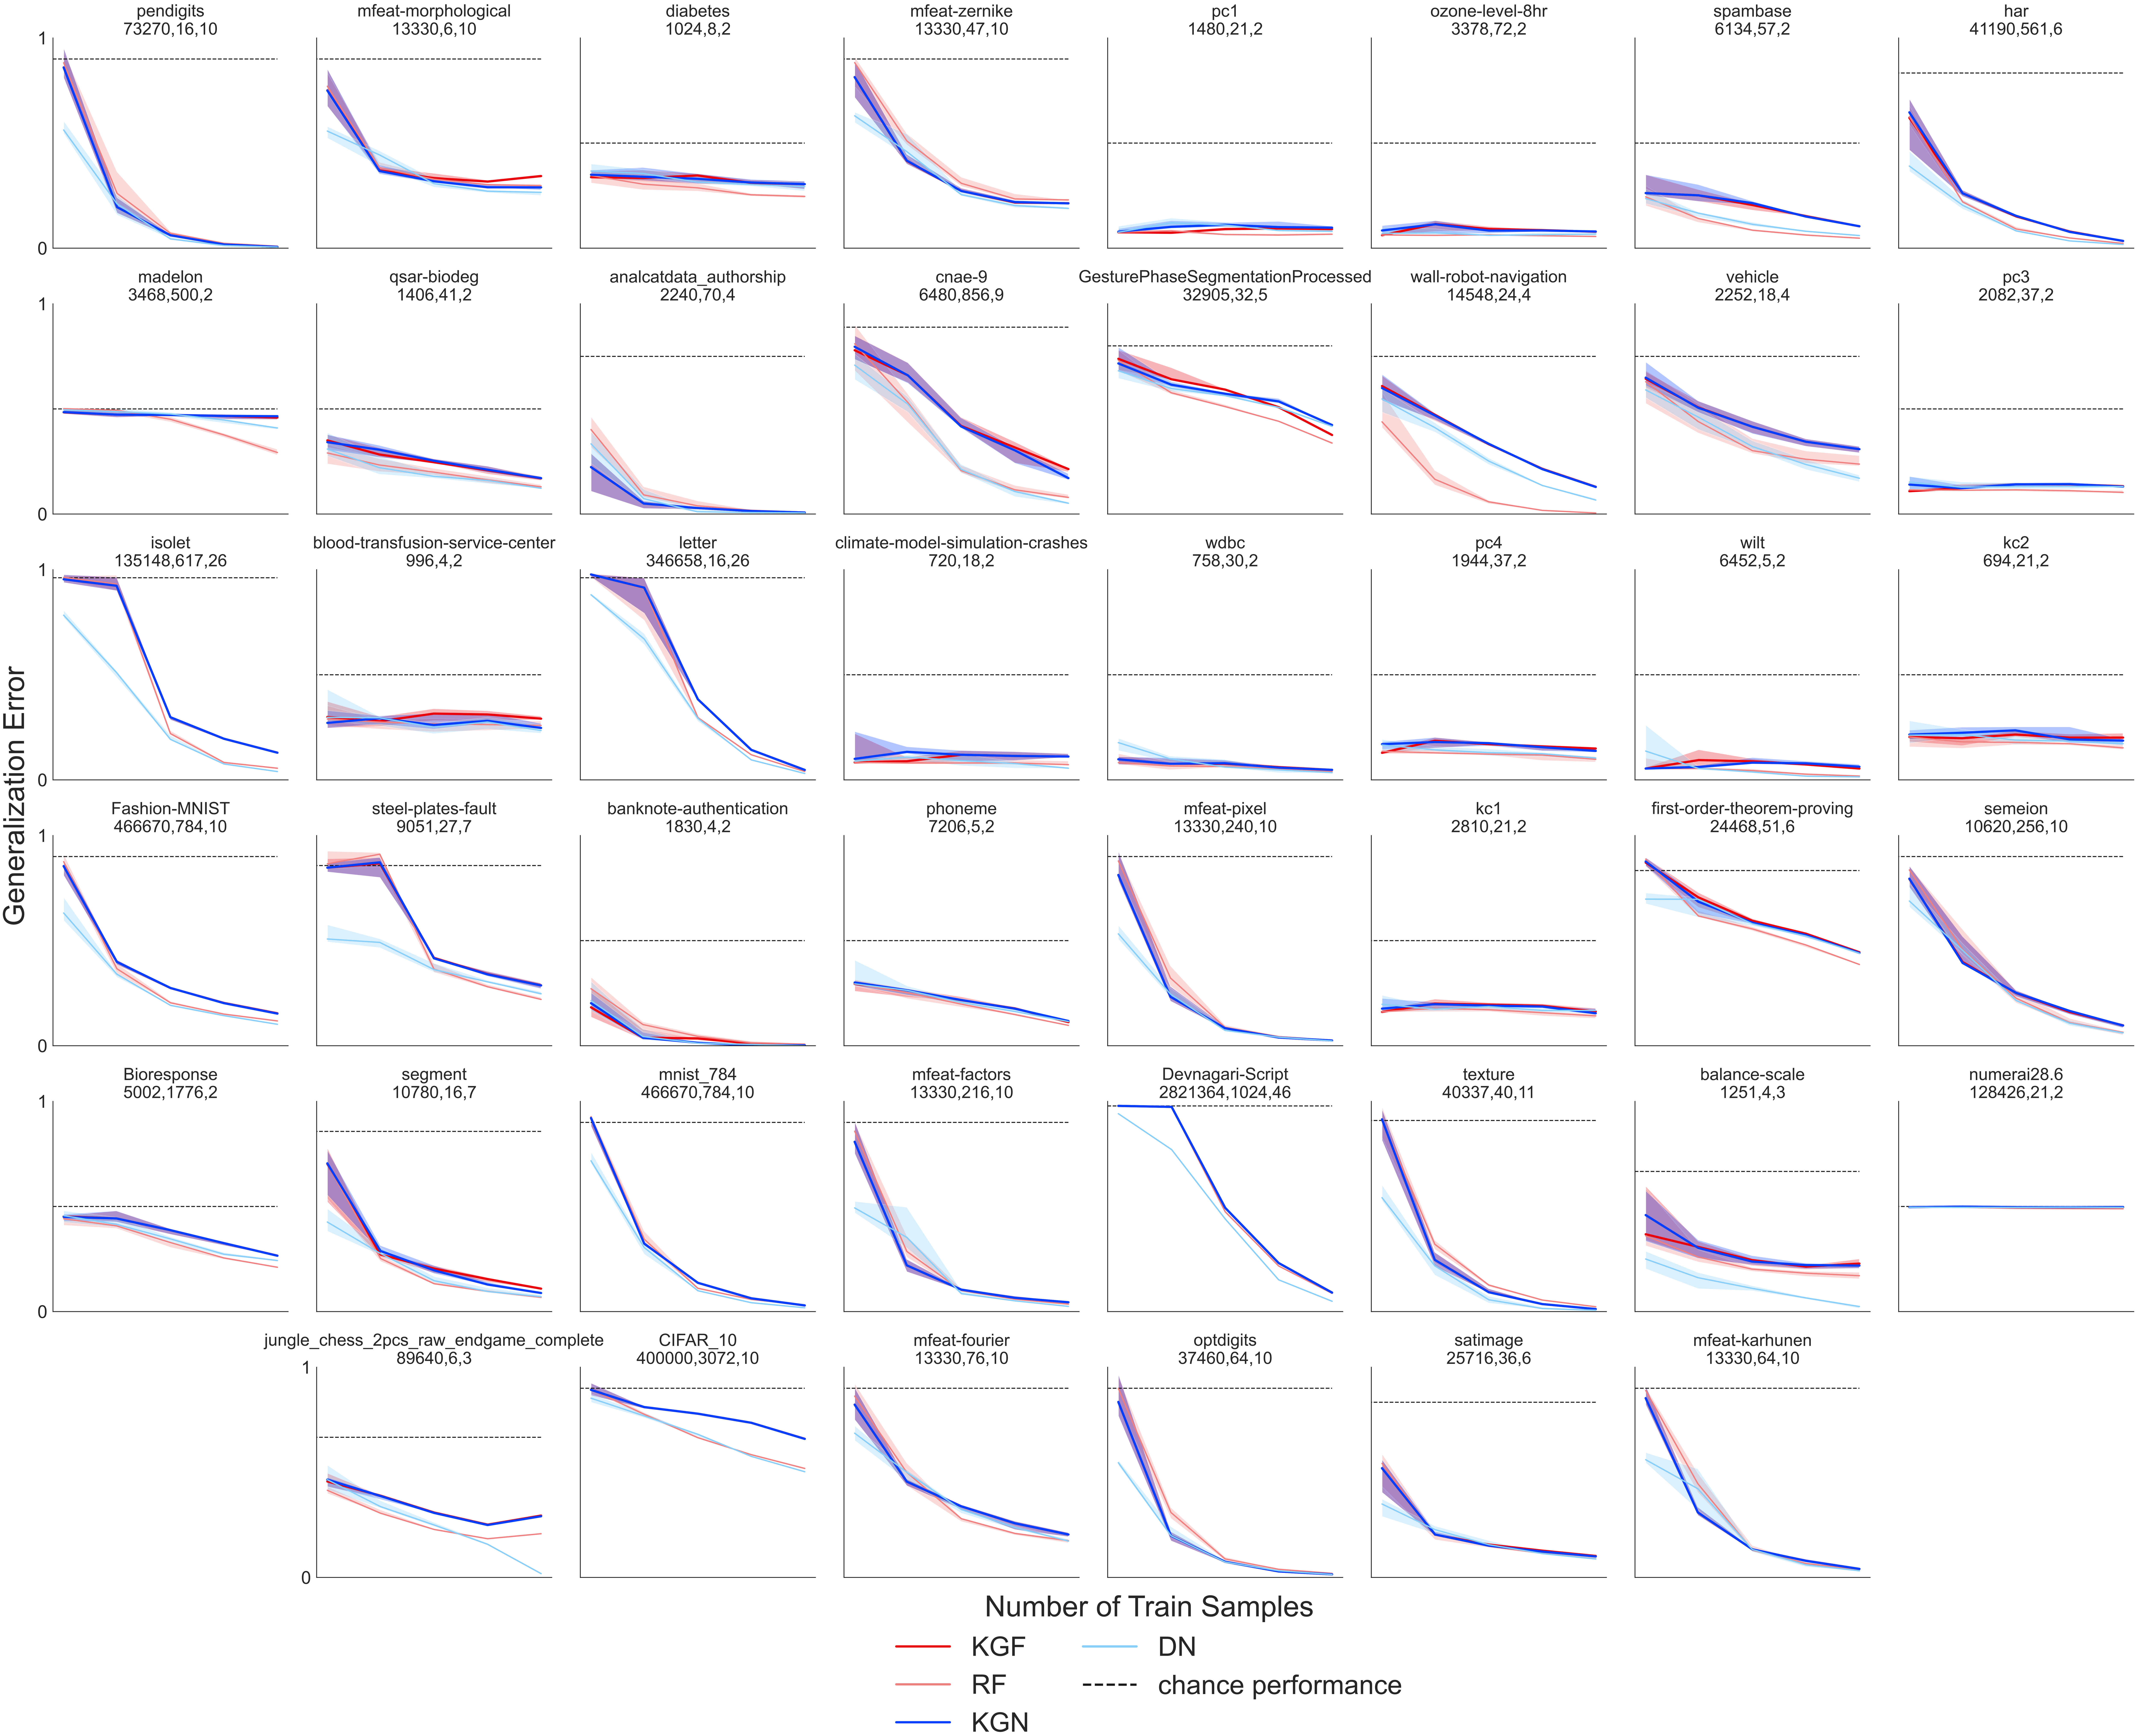

Supplement: supplementary_material [file attachment]

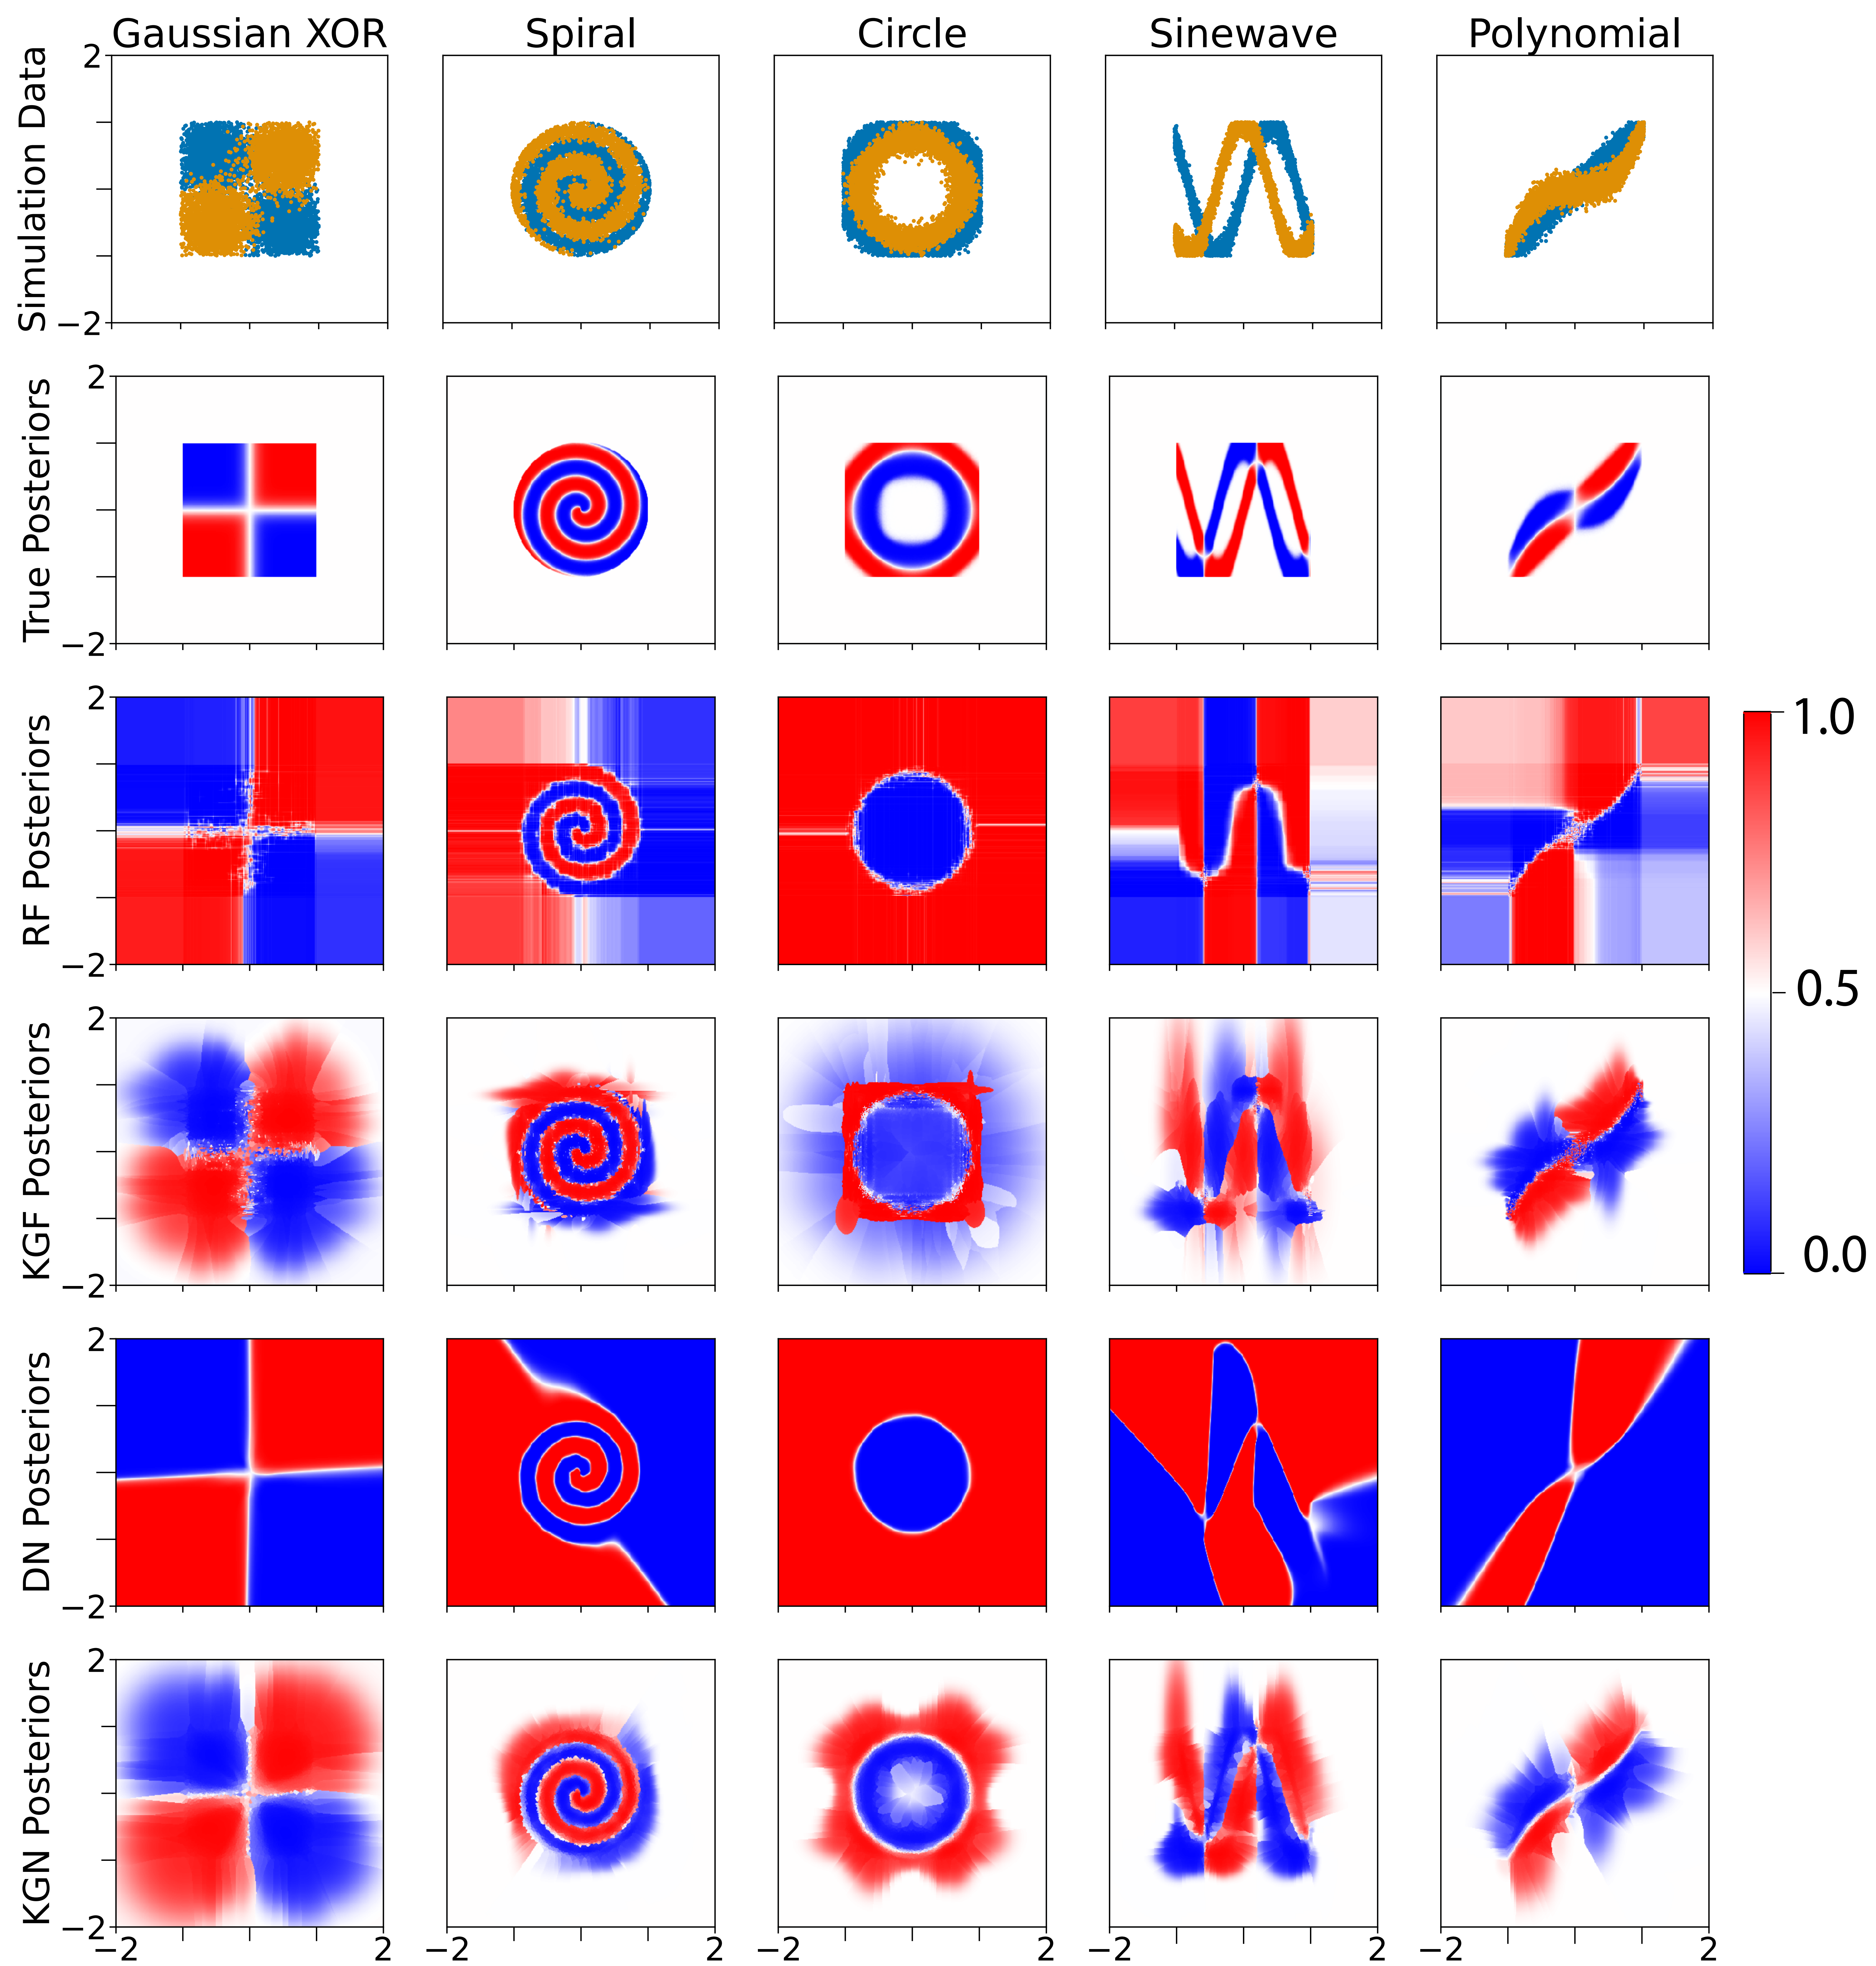

Supplement: supplementary_material [file attachment]
